# Supplementary material for: Kinome-Wide siRNA Screening Identifies DYRK1B as a Potential Therapeutic Target for Triple-Negative Breast Cancer Cells
Source: MDPI journal article supplement (doi:10.3390/cancers13225779), 2021-11-18
Supplement: s1 [file s1]

**Table S1.** The comparisons of DYRK1B expression with different tissues

| Variables | TNBC                     |        | ER+                     |        | PR+                     |        | HER2+                    |        | <i>p</i> -value* |
|-----------|--------------------------|--------|-------------------------|--------|-------------------------|--------|--------------------------|--------|------------------|
|           | Mean±SD                  | Median | Mean±SD                 | Median | Mean±SD                 | Median | Mean±SD                  | Median |                  |
|           | (n=178)                  |        | (n=809)                 |        | (n=699)                 |        | (n=166)                  |        |                  |
|           | 8.59±0.88 <sup>abc</sup> | 8.5961 | 9.20±0.63 <sup>ad</sup> | 9.2223 | 9.22±0.63 <sup>be</sup> | 9.2337 | 8.91±0.92 <sup>cde</sup> | 8.8772 | <0.001           |

Abbreviations: TNBC, triple-negative breast carcinoma ; SD, standard deviation.

\**p* values were estimated by Kruskal-Wallis one-way ANOVA test.

<sup>a</sup>*p*<0.001; <sup>b</sup>*p*<0.001; <sup>c</sup>*p*=0.0014; <sup>d</sup>*p*<0.001; <sup>e</sup>*p*<0.001.

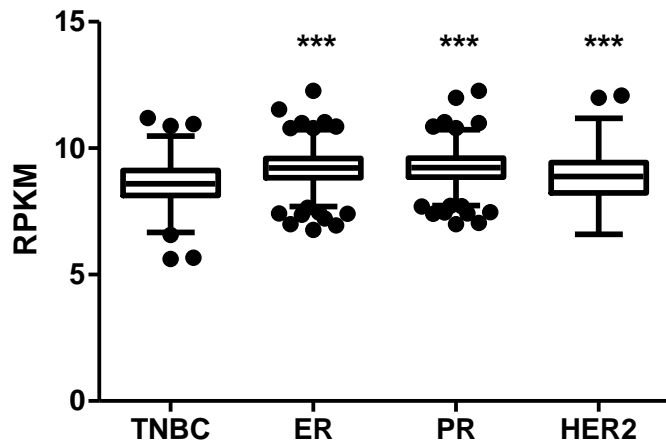

TNBC vs. ER+, *p*<0.001; TNBC vs. PR+,  
*p*<0.001; TNBC vs. HER2+, *p*=0.00144;

**Table S2.** The DYRK1B expression in tumor tissues and adjacent normal tissues in the three different subtypes of breast cancer

| Variables | Tumor adjacent normal   |        | Tumor                  |        | Melastatic             |        | <i>p</i> -value     |
|-----------|-------------------------|--------|------------------------|--------|------------------------|--------|---------------------|
|           | Mean±SD                 | Median | Mean±SD                | Median | Mean±SD                | Median |                     |
|           | (n=13)                  |        | (n=178)                |        | (n=1)                  |        |                     |
| TNBC      | 8.67±0.46               | 8.5871 | 8.59±0.88              | 8.5961 | 8.7507                 |        | 0.609*              |
|           | (n=79)                  |        | (n=809)                |        | (n=6)                  |        |                     |
| ER (+)    | 8.64±0.55 <sup>ab</sup> | 8.6020 | 9.20±0.63 <sup>a</sup> | 9.2223 | 9.18±0.86 <sup>b</sup> | 8.9995 | <0.001 <sup>§</sup> |
|           | (n=69)                  |        | (n=699)                |        | (n=6)                  |        |                     |
| PR (+)    | 8.62±0.61 <sup>cd</sup> | 8.6016 | 9.22±0.63 <sup>c</sup> | 9.2337 | 9.18±0.86 <sup>d</sup> | 8.9995 | <0.001 <sup>§</sup> |
|           | (n=21)                  |        | (n=166)                |        | (n=1)                  |        |                     |
| HER2 (+)  | 8.62±0.34               | 8.6360 | 8.91±0.92              | 8.8772 | 10.7909                |        | 0.005*              |

Abbreviations: TNBC, triple-negative breast carcinoma ; SD, standard deviation.

\**p* values were estimated by Student's *t*-test.

<sup>§</sup>*p* values were estimated by Kruskal-Wallis one-way ANOVA test.

<sup>a</sup>*p*<0.001; <sup>b</sup>*p*=0.028; <sup>c</sup>*p*<0.001; <sup>d</sup>*p*=0.029.

**Table S3.** Impact of DYRK1B expression levels on overall survival by the different demographic and clinicopathologic factors with TNBC

| Variable         | DYRK1B | No. (%)   | CHR (95% CI)              | <i>p value</i> * | AHR (95% CI)           | <i>p value</i> †   |
|------------------|--------|-----------|---------------------------|------------------|------------------------|--------------------|
| Sex              |        |           |                           |                  |                        |                    |
| Female           | Low    | 66 (53.7) | 1                         |                  | 1                      |                    |
|                  | High   | 57 (46.3) | <b>3.22 (1.16-8.95)</b>   | <b>0.025</b>     | 2.39 (0.84-6.80)       | 0.104 <sup>a</sup> |
| Age, yrs         |        |           |                           |                  |                        |                    |
| ≤50              | Low    | 21 (46.7) | 1                         |                  | 1                      |                    |
|                  | High   | 24 (53.3) | 3.18 (0.66-15.34)         | 0.149            | 2.73 (0.54-13.76)      | 0.225 <sup>a</sup> |
| >50              | Low    | 45 (57.7) | 1                         |                  | 1                      |                    |
|                  | High   | 33 (42.3) | 3.09 (0.79-12.07)         | 0.105            | 2.65 (0.66-10.70)      | 0.171 <sup>a</sup> |
| AJCC stage       |        |           |                           |                  |                        |                    |
| I, II            | Low    | 56 (57.1) | 1                         |                  | -                      |                    |
|                  | High   | 42 (42.9) | 2.75 (0.71-10.67)         | 0.216            | -                      | -                  |
| III, IV          | Low    | 9 (40.9)  | 1                         |                  | -                      |                    |
|                  | High   | 13 (59.1) | 2.26 (0.47-10.94)         | 0.309            | -                      | -                  |
| T classification |        |           |                           |                  |                        |                    |
| T1, T2           | Low    | 61 (56.5) | 1                         |                  | 1                      |                    |
|                  | High   | 47 (43.5) | 2.14 (0.71-6.40)          | 0.174            | 1.62 (0.50-5.20)       | 0.421 <sup>d</sup> |
| T3, T4           | Low    | 4 (28.6)  | 1                         |                  | 1                      |                    |
|                  | High   | 10 (71.4) | 33.40 (0.01-143737.67)    | 0.411            | 41.79 (0.01-248111.88) | 0.400 <sup>d</sup> |
| N classification |        |           |                           |                  |                        |                    |
| N0               | Low    | 49 (62.8) | 1                         |                  | 1                      |                    |
|                  | High   | 29 (37.2) | 4.35 (0.79-24.70)         | 0.092            | 4.22 (0.77-23.19)      | 0.098 <sup>e</sup> |
| N1, N2, N3       | Low    | 17 (37.8) | 1                         |                  | 1                      |                    |
|                  | High   | 28 (62.2) | 1.60 (0.43-5.93)          | 0.483            | 1.53 (0.41-5.68)       | 0.524 <sup>e</sup> |
| Postoperative RT |        |           |                           |                  |                        |                    |
| No               | Low    | 26 (52.0) | 1                         |                  | 1                      |                    |
|                  | High   | 24 (48.0) | <b>10.30 (1.26-83.96)</b> | <b>0.029</b>     | 6.02 (0.67-53.96)      | 0.109 <sup>a</sup> |
| Yes              | Low    | 35 (57.4) | 1                         |                  | 1                      |                    |
|                  | High   | 26 (42.6) | 3.11 (0.28-34.45)         | 0.355            | 1.50 (0.13-16.84)      | 0.745 <sup>a</sup> |

Abbreviations: TNBC, Triple-negative breast cancer; CHR, crude hazard ratio; CI, confidence interval; AHR, adjusted hazard ratio; AJCC, American Joint Committee on Cancer; RT, radiotherapy. \**p* values were estimated by Cox's regression. †*p* values were estimated by multivariate Cox's regression. <sup>a</sup>Adjusted for AJCC pathological stage (stage III+ IV vs stage I+II). <sup>d</sup>Adjusted for N classification (N1, N2, N3 vs N0). <sup>e</sup>Adjusted for T classification (T3+ T4 vs T1+T2).
