# Supplementary figures and images for: Kinome-Wide siRNA Screening Identifies DYRK1B as a Potential Therapeutic Target for Triple-Negative Breast Cancer Cells
Source: MDPI journal article supplement (doi:10.3390/cancers13225779), 2021-11-18

**Fig 1D**

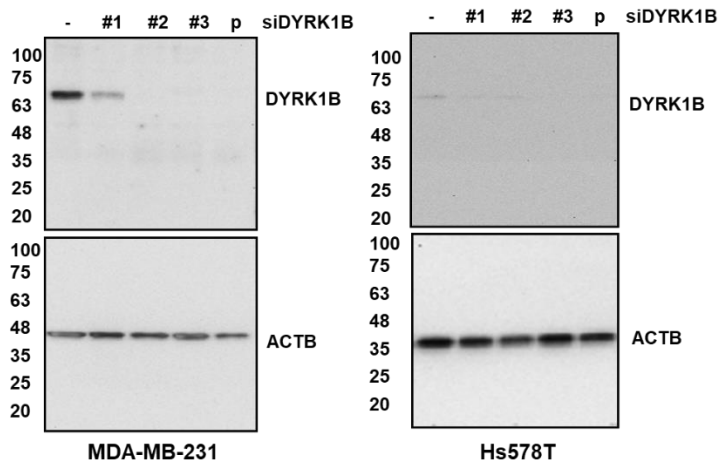

**Fig 2A**

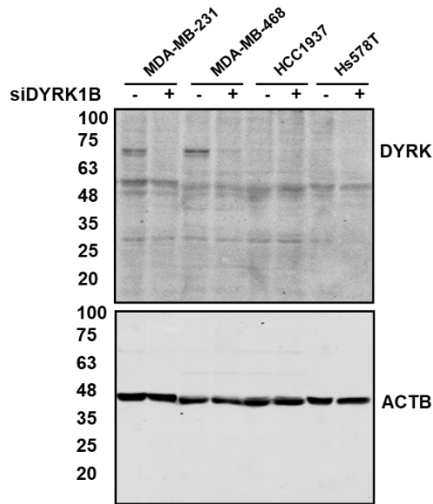

**Fig. 3B**

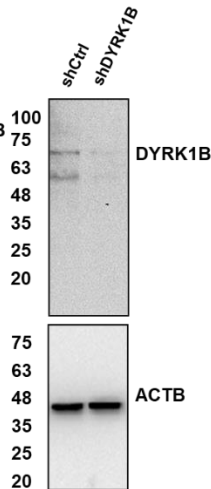

**Fig. 4E**

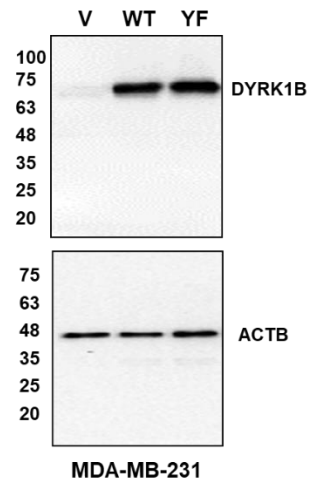

**Fig. 4F**

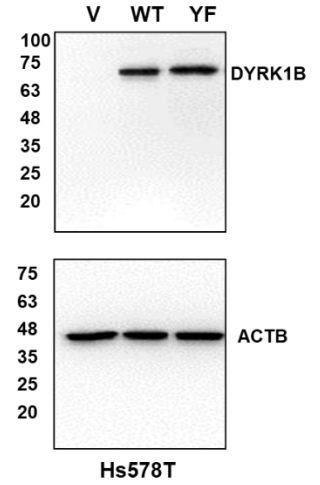

Supplement: s1 [file s1]
